# Supplementary material for: Coding and Non-Coding RNA Abnormalities in Bipolar Disorder
Source: MDPI journal article supplement (doi:10.3390/genes10110946), 2019-11-19
Supplement: s2 [file s2]

# **Coding and non-coding RNA abnormalities in bipolar disorder**

Jurjen J. Luykx<sup>\*1,2,3#</sup>, F. Giuliani<sup>\*1</sup>, G. Giuliani<sup>1</sup>, J.H. Veldink<sup>1,4</sup>

<sup>1</sup> Department of Translational Neuroscience, Brain Center Rudolf Magnus, University Medical Center Utrecht, Utrecht University, Utrecht, The Netherlands

<sup>2</sup> Department of Psychiatry, Brain Center Rudolf Magnus, University Medical Center Utrecht (UMCU), Utrecht University, Utrecht, the Netherlands

<sup>3</sup> Department of Psychiatry, ZNA Hospitals, Antwerp, Belgium

<sup>4</sup> Department of Neurology, Brain Center Rudolf Magnus, University Medical Center Utrecht (UMCU), Utrecht University, Utrecht, the Netherlands

\*These authors equally contributed to this work.

# To whom correspondence should be addressed at:

Jurjen J Luykx | Brain Center Rudolf Magnus | University Medical Center Utrecht, Universiteitsweg 100, office 4.127 (Stratenum), HP 4.205 | 3584 CG Utrecht | The Netherlands | +31 (0)88 75 68638 | j.luykx@umcutrecht.nl

## Supplemental Results

**Supplemental Figure S1. Principal components analysis of all four cases (PAT1, PAT2, PAT3 and PAT6) and the controls (CTL2, CTL4, CTL5, and CTL6) used for sequencing.** The clustering indicates no gross differences in clustering between cases and controls, rendering any case-control differences other than disease status driving our results unlikely.

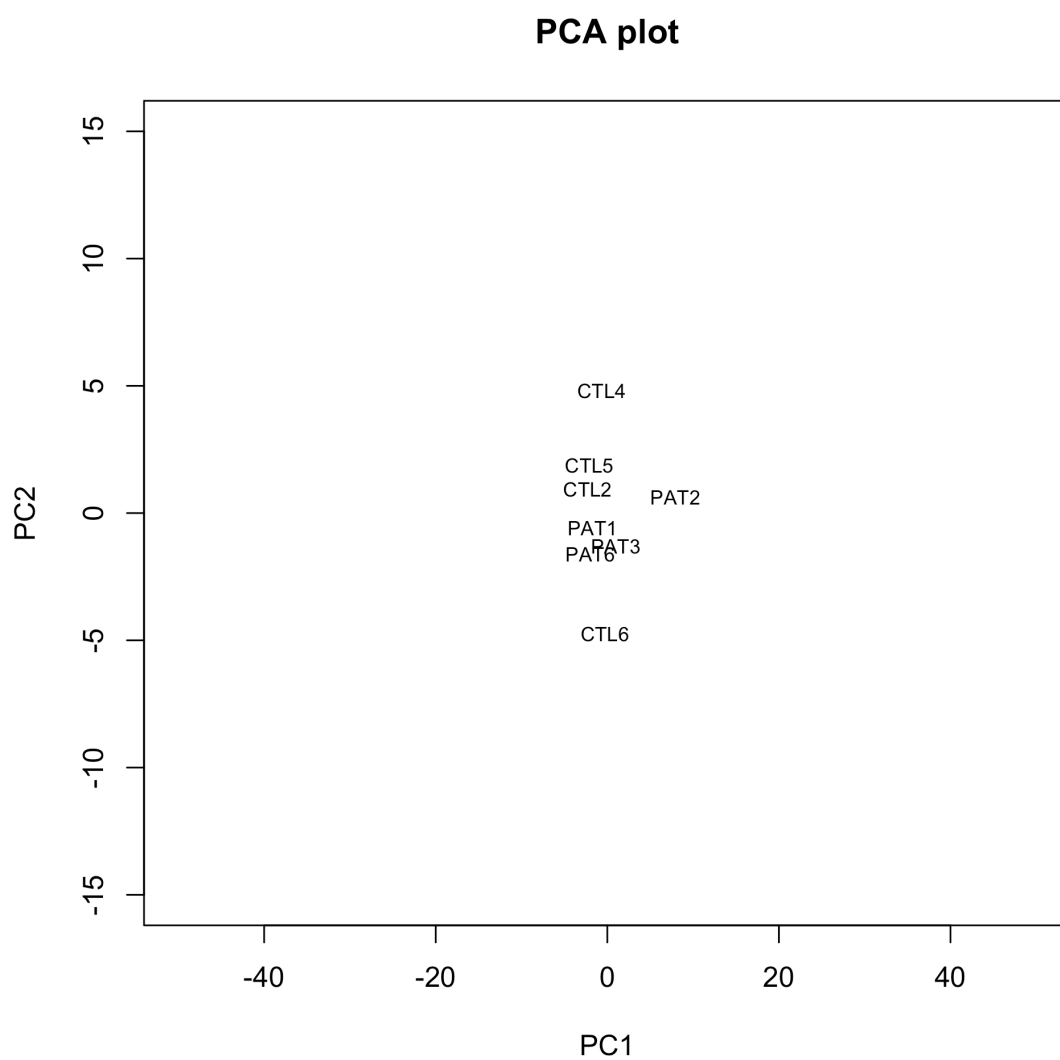

**Supplemental Figure S2. Correlation analyses between our dataset and two independent sets of dorsolateral prefrontal cortex (DLPFC) brain samples published by Akula and colleagues.**

Significant correlation in log2-fold change values ( $\log_2[\text{mean}(\text{BPD})/\text{mean}(\text{CTL})]$ ) of genes from our dataset with the HGB1\_10 set ( $r=0.38$ ,  $p < 2.2 \times 10^{-16}$ ; A). Significant correlation in log2-fold change values of genes from our dataset with the HGB11\_22 set ( $r=0.28$ ,  $p < 2.2 \times 10^{-16}$ ; B).

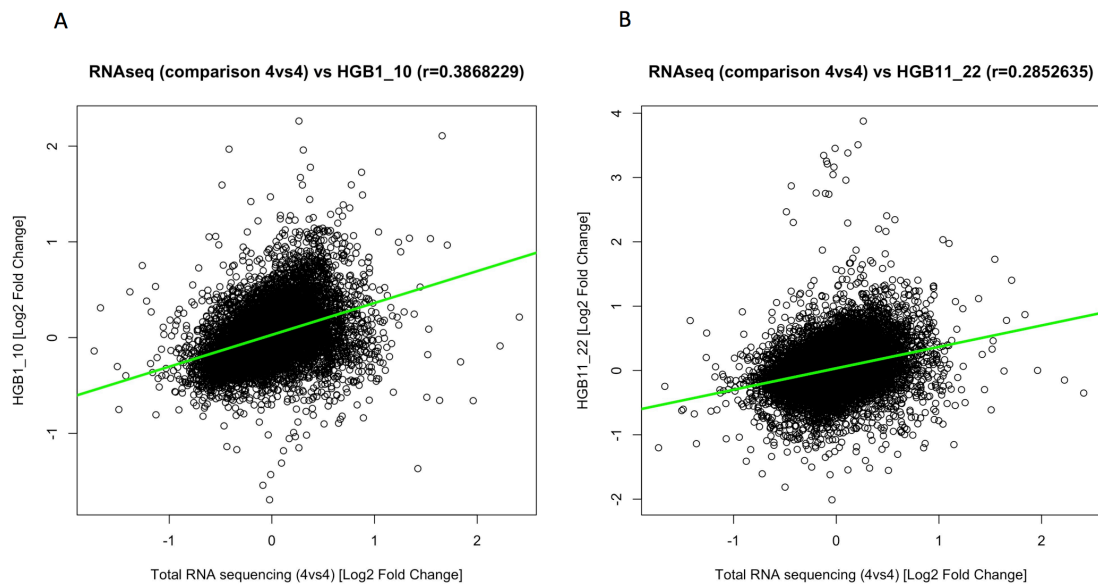

**Supplemental Figure S3 A-E. Cell-type specificity of each of the top five differentially expressed genes between bipolar disorder cases and controls: of the genes *Cd93* (A); *Socs3* (B); *Bcl6b* (C); *Tnfrs11b* (D); and *Podxl* (E).**

All but one gene (*Socs3*) were found to have more than 10-fold higher expression levels in endothelial tissue than any other cell type; FPKM, fragments per kilobase of transcript sequence per million mapped fragments.

**A**

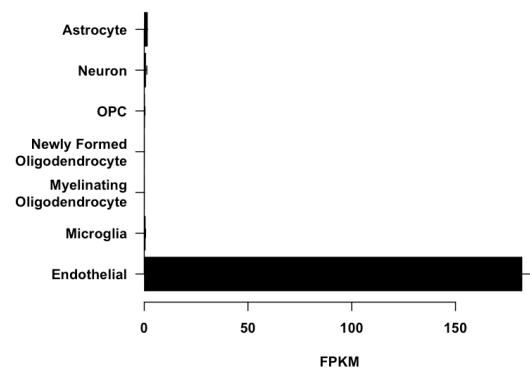

**B**

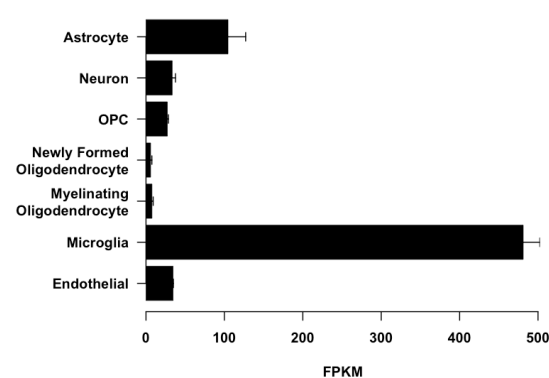

**C**

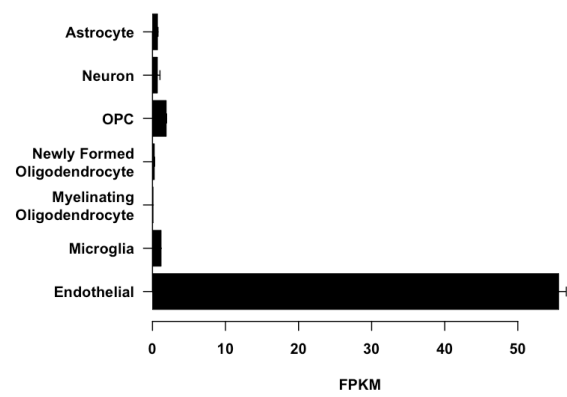

**D**

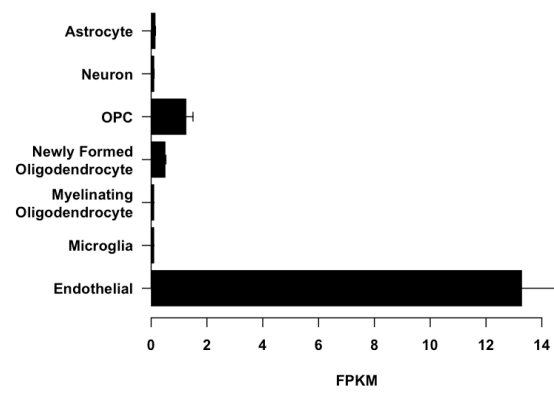

**E**

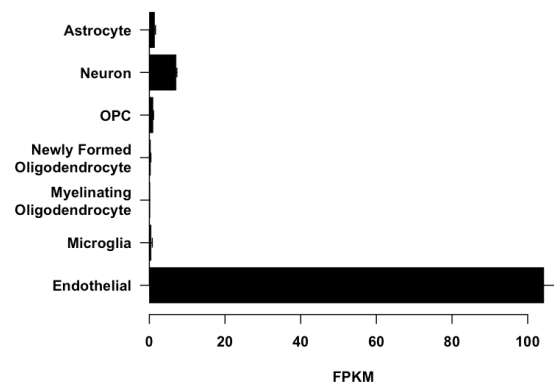

**Supplemental Figure S4. Functional characterization of dysregulated pathways in BPD brain.** Enrichments for GO biological processes among the 36 differentially expressed genes (DEGs) at FDR<0.1 (A). Gene-set enrichment analysis for BPD-associated gene sets showing enrichment for “Histone H3@K4 demethylation” (GO:0034720) term (adjusted p-value= 0.00017; B). BD=bipolar disorder.

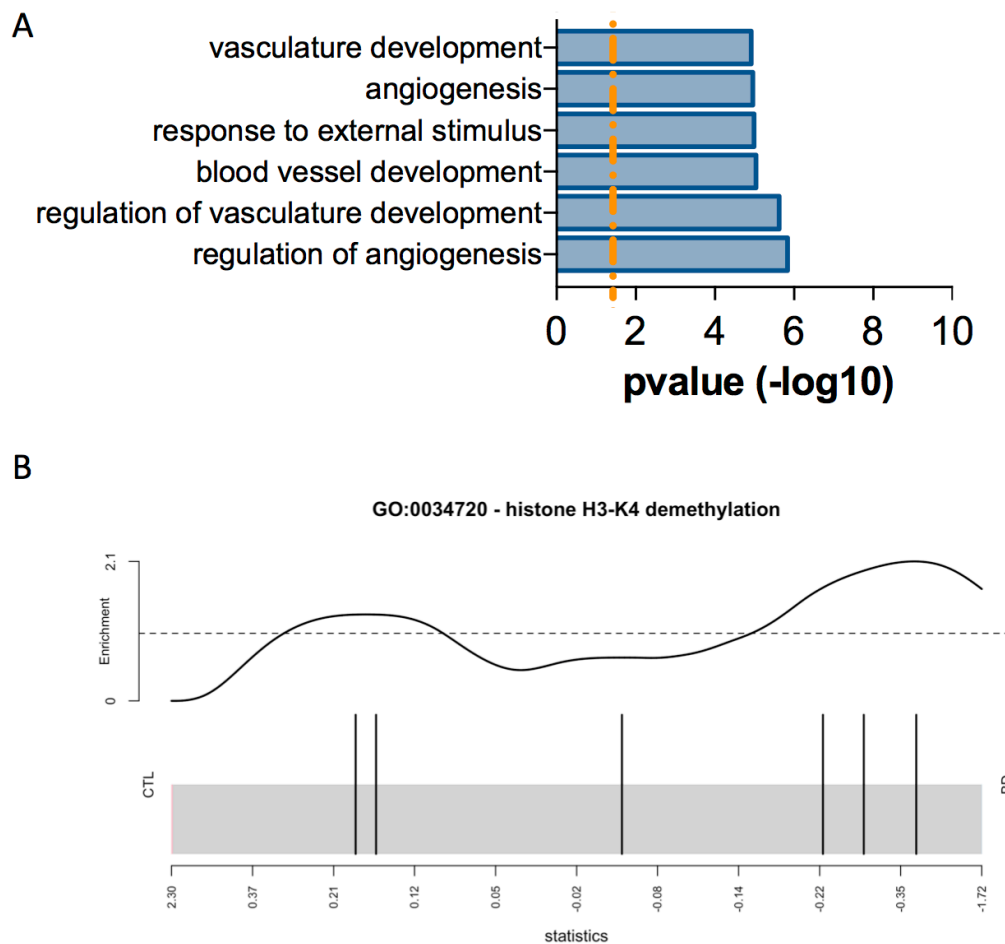

**Supplemental Figure S5. Alternative splicing (AS) case-control comparisons.**

The six most thoroughly described AS events are depicted (A). AS events were more abundant in the medial frontal gyrus of BPD patients than controls (B). Bar plots summarizing the relevant GO term categories of BPD-specific events for each AS class (C).

Abbreviations and explanations: BPD, bipolar disorder; Shared, events found in both controls and BPD brains; Total number of alternative splicing in Controls, total number of events found in control brains; Total number in BPD, total number of events found in BPD brains; Percentage (%), the increase in numbers of events in BPD compared to healthy controls. In parentheses, the number genes carrying AS events in BPD and control brains.

A

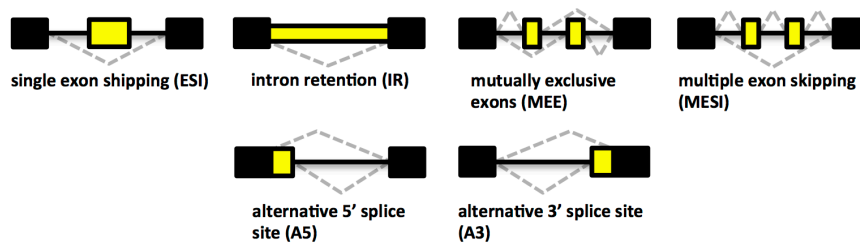

B

Number of events per AS class

| AS class | Controls     | Shared        | BPD          | Total number<br>in Controls | Total number<br>in BPD | Percentage (%) |
|----------|--------------|---------------|--------------|-----------------------------|------------------------|----------------|
| ESI      | 10330 (4756) | 21957 (9167)  | 11752 (5229) | 32287 (13923)               | 33709 (14396)          | 4.4 (3.4)      |
| MESI     | 8016 (3566)  | 13739 (6602)  | 9293 (3989)  | 21755 (10168)               | 23032 (10591)          | 5.9 (4.1)      |
| ISI      | 19699 (5827) | 42308 (10793) | 23614 (6660) | 62007 (16620)               | 65922 (17453)          | 6.3 (5)        |
| A5       | 1409 (1168)  | 6115 (4325)   | 2032 (1563)  | 7524 (5493)                 | 8147 (5888)            | 8.3 (7.2)      |
| A3       | 1121 (939)   | 4313 (3117)   | 1605 (1276)  | 5434 (4056)                 | 5918 (4393)            | 8.9 (8.3)      |
| MEE      | 82 (40)      | 205 (102)     | 84 (41)      | 287 (142)                   | 289 (143)              | 0.7 (0.7)      |

C

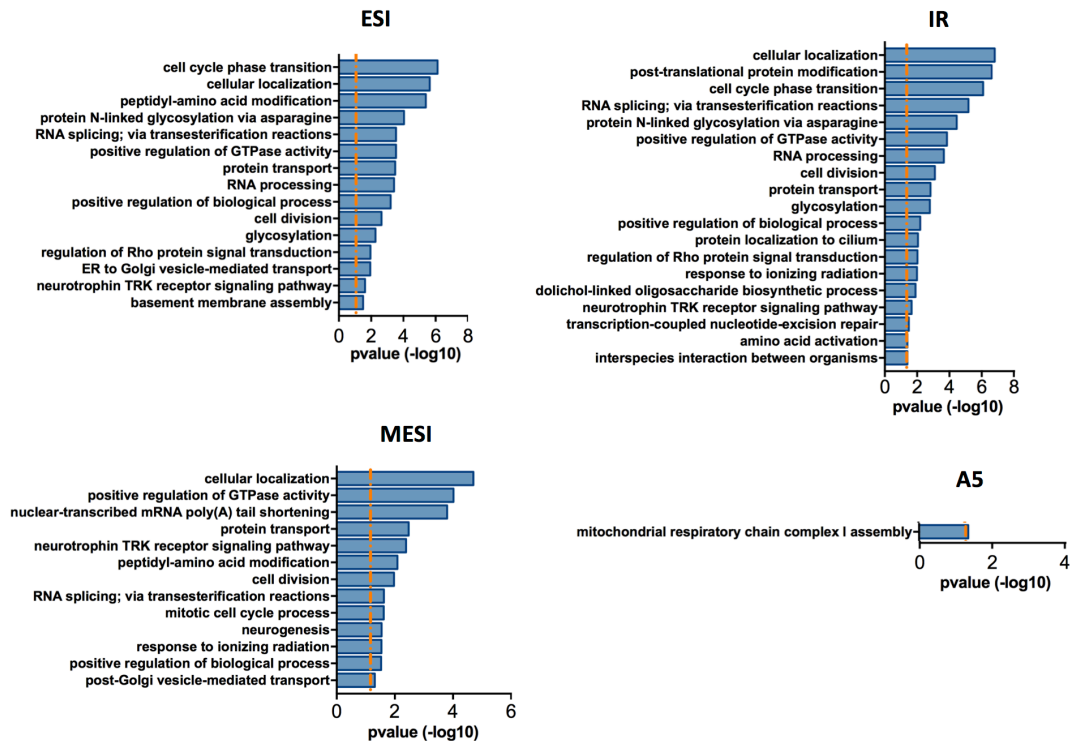



**Supplemental Figure S6. GO term enrichment analysis of the unique and common events in BPD and controls for each of the AS classes.**

Barplot graphs summary of gene ontology analysis of unique and common ESI (A), MESI (B), IRI (C), A5 (D), and A3 (E) events identified in control and BPD samples. No enrichment was found for genes carrying MEE events. Red, blue and green bars represent biological processes enriched by common, BPD-specific and control-specific AS events, respectively.

A.

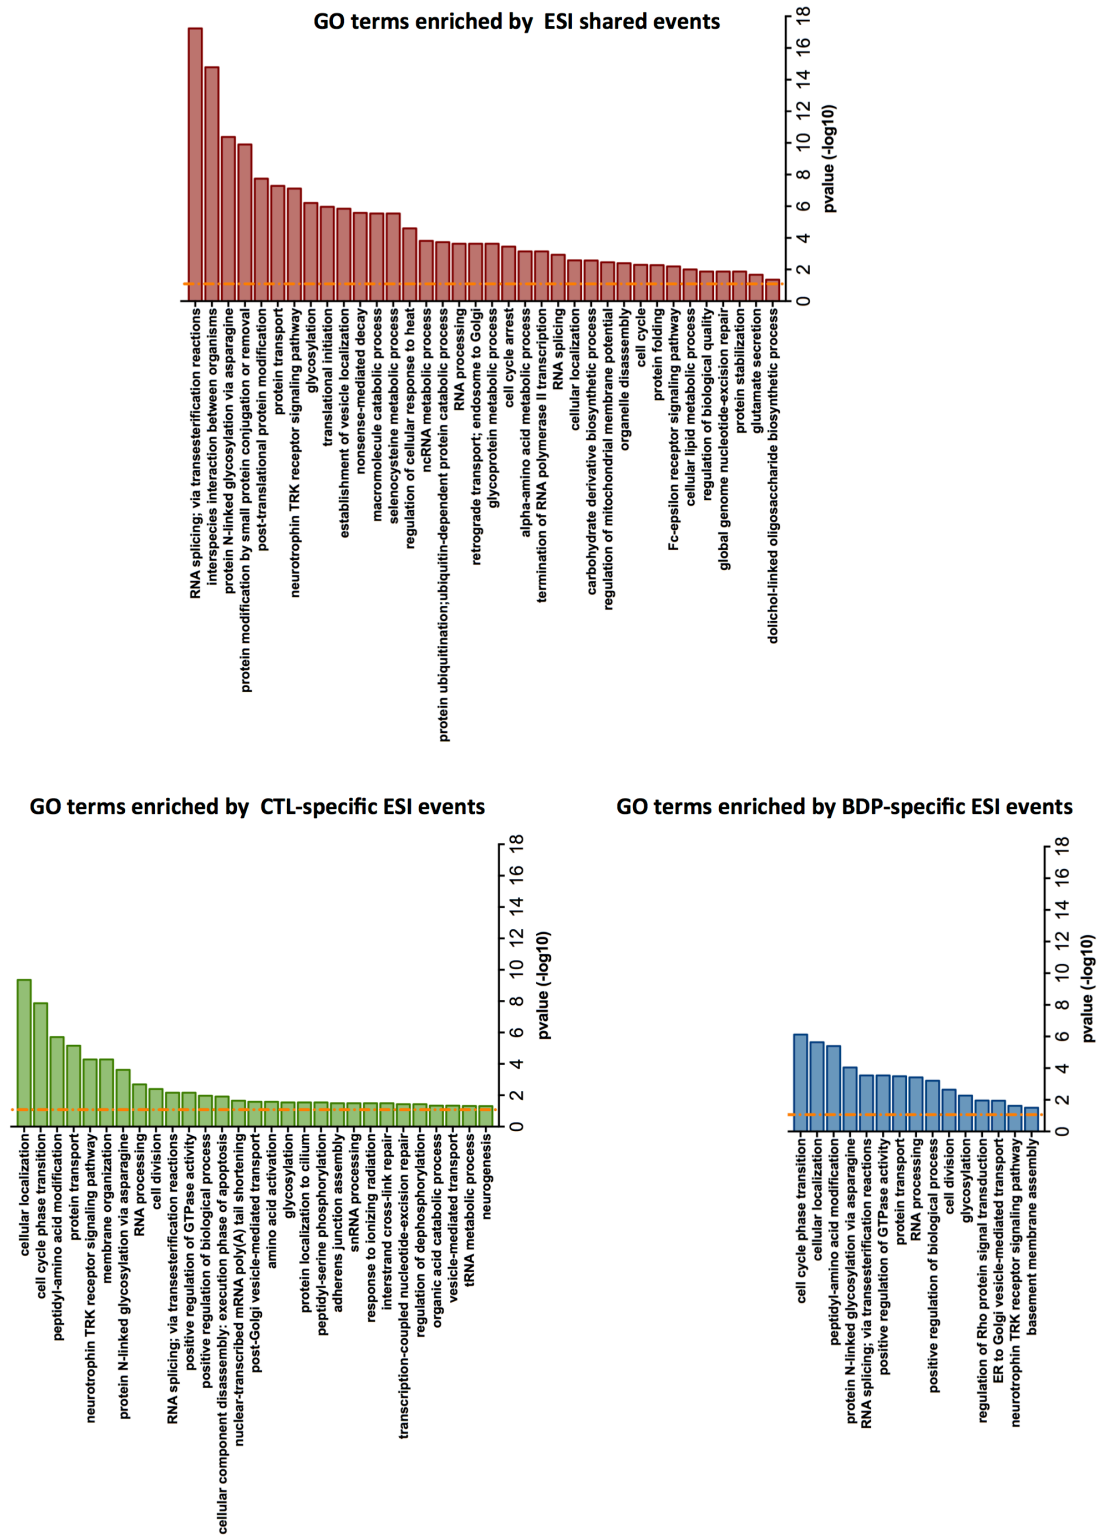

B.

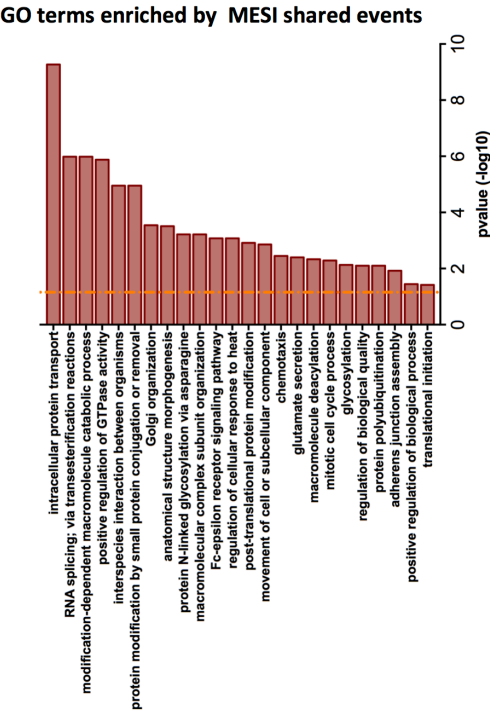

GO terms enriched by CTL-specific MESI events

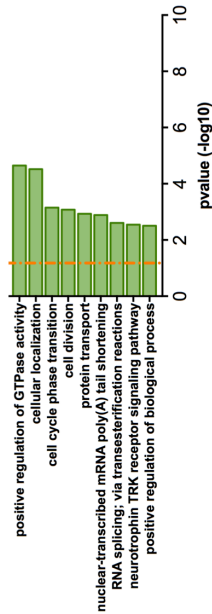

GO terms enriched by BDP-specific MESI events

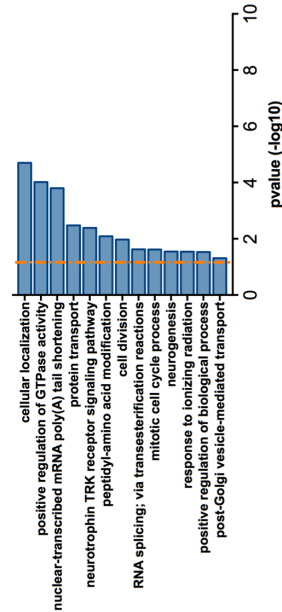

C.

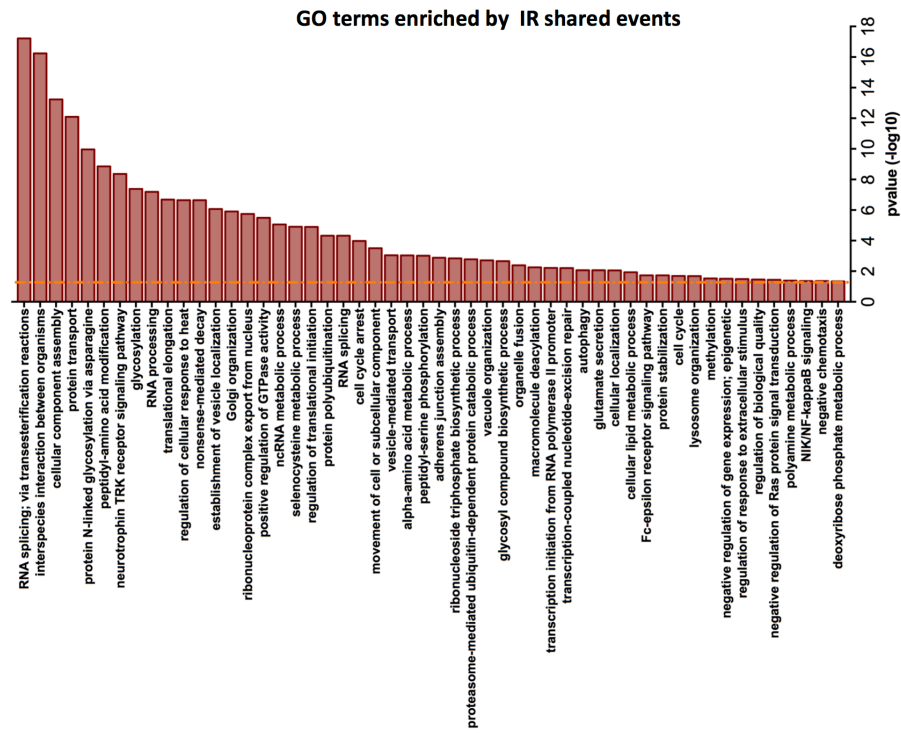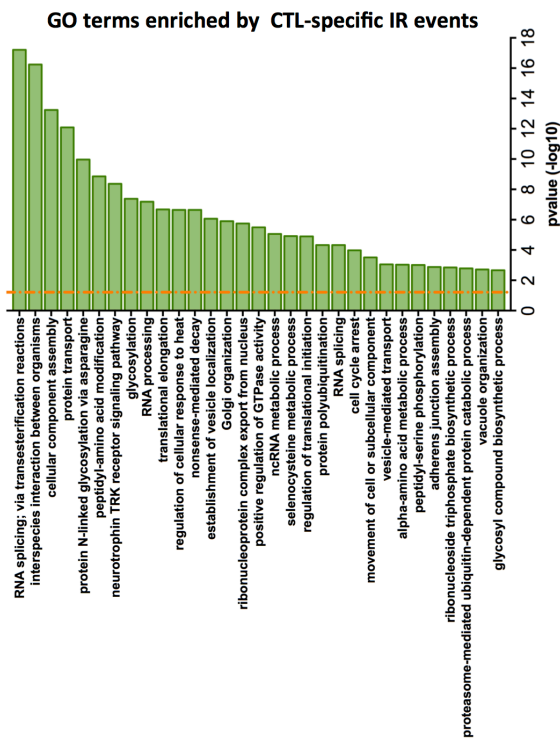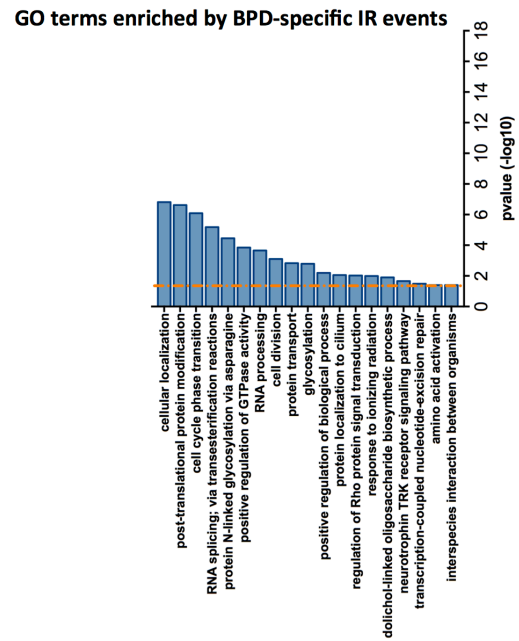

D.

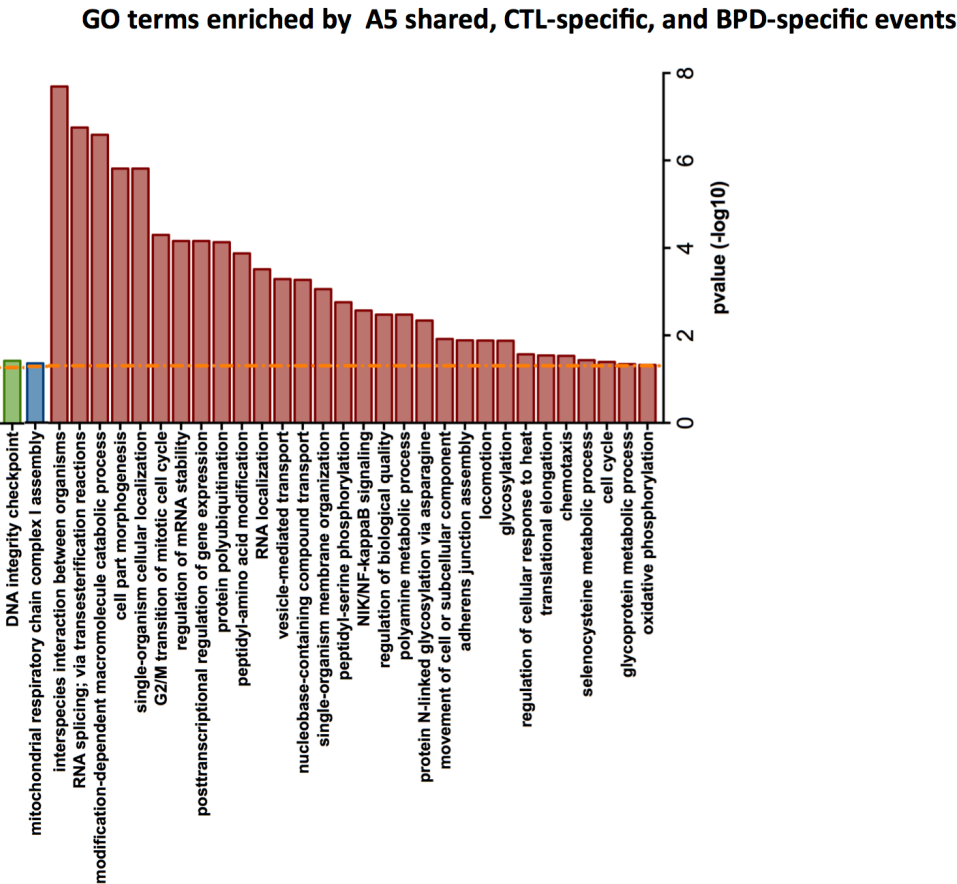

E.

## GO terms enriched by A3 shared events

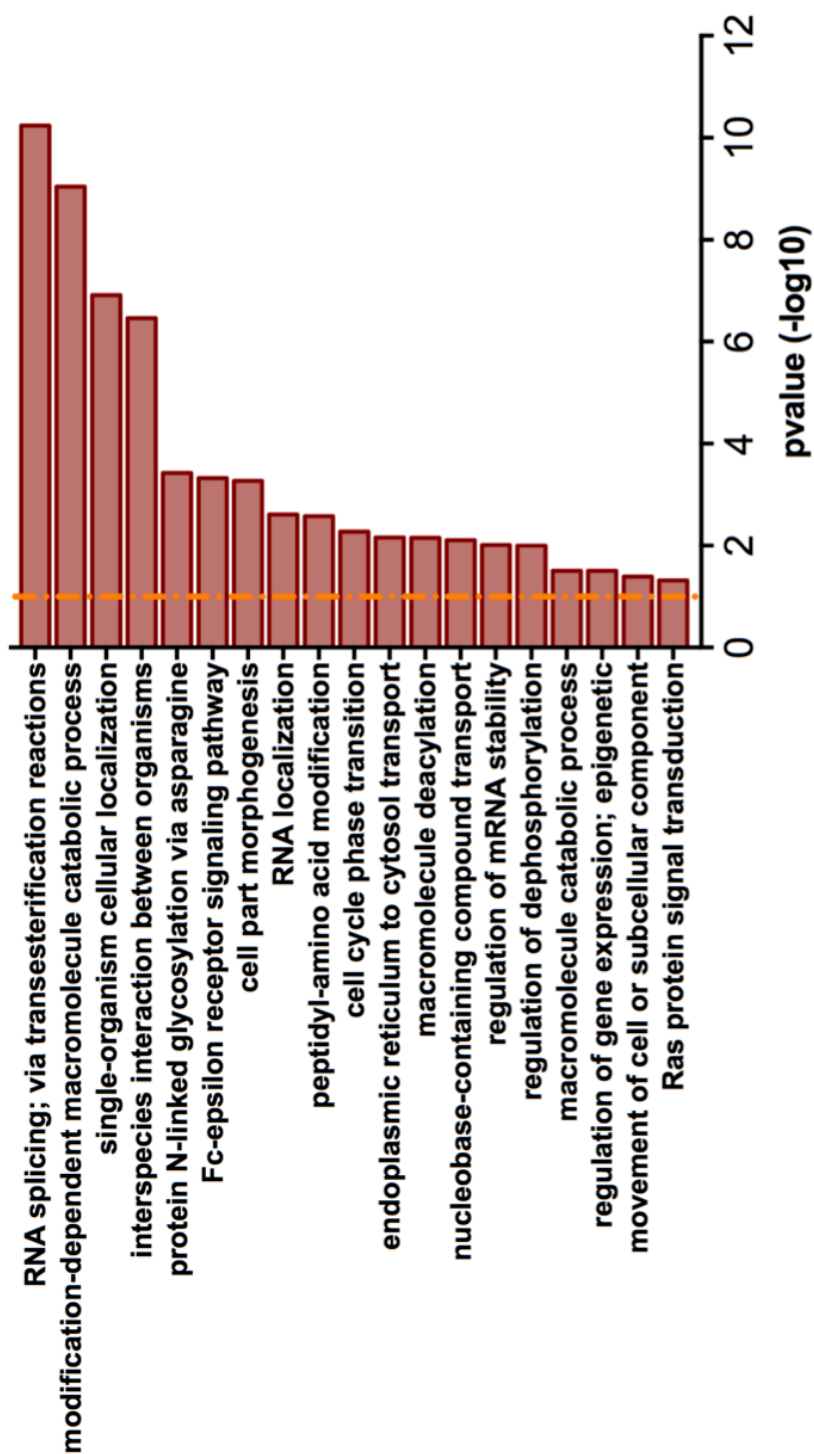

### Supplemental Figure S7. lncRNAs.

Boxplots of normalized log<sub>2</sub> expression values of protein coding genes and lncRNAs in every sequenced sample (left four are controls and right four are BPD patients; A). Boxplots of normalized log<sub>2</sub> expression values of protein coding genes and lncRNAs (B). lncRNAs displayed lower overall expression compared to protein coding genes ( $p = 1.08 \times 10^{-9}$ ).

The bottom and top of the boxes represent the first and third quartiles, respectively, and the band inside the box is the median; the ends of the whiskers represent the lowest value within 1.5 interquartile range (IQR) of the lower quartile and the highest value within 1.5 IQR of the upper quartile.

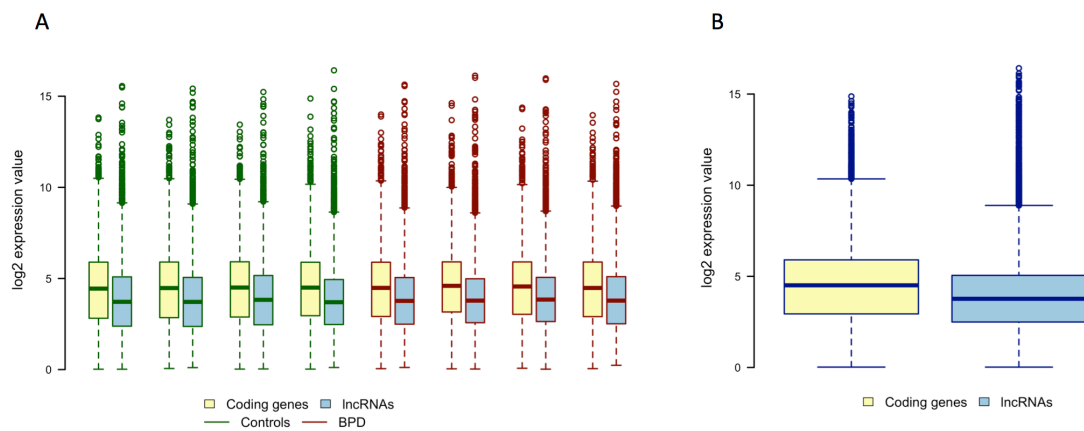

**Supplemental Table:**

- Sheets 1 and 2: Detailed demographic information of the study population. Abbreviations: BPD, bipolar disorder; F, female; M, male; NA, not available; PMI, postmortem interval; Side, brain side; L, left; Mood stabilizers at death, use of mood stabilizers in the last 24 hours of life; Psychoactive drugs at death, use of psychotropic medications in the last 24 hours of life; Psychoactive drugs, ever-reported use of psychotropic medications; ECT, history of electroconvulsive therapy; 'Y' represents if there is a record of an individual having taken at least one medication/therapy and 'N' if there is no such record.
- Sheet 3: Postmortem brain tissue information. Outlined are the postmortem brain conditions per subject.
- Sheet 4: Differential regulation of gene expression in medial frontal gyrus in bipolar disorder. Summary table of the differentially expressed genes in BPD medial frontal gyrus at  $FDR < 0.05$  (bold) and  $FDR < 0.1$ .
- Sheet 5: Results of the validation and replication analyses. Shown are the summary statistics for the 5 genes in the validation and replication steps.
- Sheet 6: Summary statistics for GO term enrichment analysis on the 36 differentially expressed genes at  $FDR < 0.1$  (A); and gene-set enrichment analysis (GSEA) for BPD-associated gene sets (B).
- Sheet 7: Overview of chi-squared test results for each of the AS (alternative splicing) classes and the total number of AS events. Also shown are the numbers of genes carrying such AS events.
- Sheet 8: Overlap between AS events and DEGs.
- Sheet 9: AS events in BPD susceptibility genes.
- Sheet 10: Summary table of the differentially expressed lncRNA transcripts.
- Sheet 11: Overview of circular RNAs populating the medial frontal gyrus (first 2000 rows).
- Sheet 12: When applying a log fold change cutoff of  $\geq 1.5$  or  $\leq -1.5$  irrespective of statistical significance, 689 circRNAs were either upregulated or downregulated in BPD
- Sheet 13: This is the full list of circRNA toptags from the DE analysis, where all the logFC and the FDR of all circRNA transcripts included in the DE analysis can be found.
- Sheet 14: Three additional circular transcripts generate the ZDHHC11 locus (whose expression in logFC is between 0,04 and 0,49).
- Sheet 15: Of the 104 known BPD-associated loci described in ref7-9, 43 gave rise to a number of circular transcripts. Although all of them are not significant, five of these circRNAs exhibit high logFC (green = up; red = down).
- Sheet 16: There is no significant difference in expression for linear NEBL and EPHA3 transcripts between the controls and BPD brains.
